# Supplementary material for: Engineering ssRNA tile filaments for (dis)assembly and membrane binding
Source: Royal Society of Chemistry journal article supplement (doi:10.1039/d3nr06423a), 2024-01-01
Supplement: d3nr06423a1.pdf [file d3nr06423a1.pdf]

## **Supplementary information**

### **Engineering ssRNA tile filaments for (dis)assembly and membrane binding**

Nicola De Franceschi<sup>1</sup>, Baukje Hoogenberg<sup>1</sup>, Allard Katan<sup>1</sup> and Cees Dekker<sup>1,\*</sup>

<sup>1</sup> *Department of Bionanoscience, Kavli Institute of Nanoscience Delft, Delft University of Technology, Delft, The Netherlands*

*\*Corresponding author: c.dekker@tudelft.nl*

### **Table of contents**

**Supplementary Figure 1:** Tiles T1 assembly into filaments

**Supplementary Figure 2:** Images used for filament length quantification

**Supplementary Figure 3:** tile binding to membrane via cholesterol or aptamer anchors

**Supplementary Figure 4:** T-cap design and Helicase binding

**Supplementary Figure 5:** isothermal tile refolding

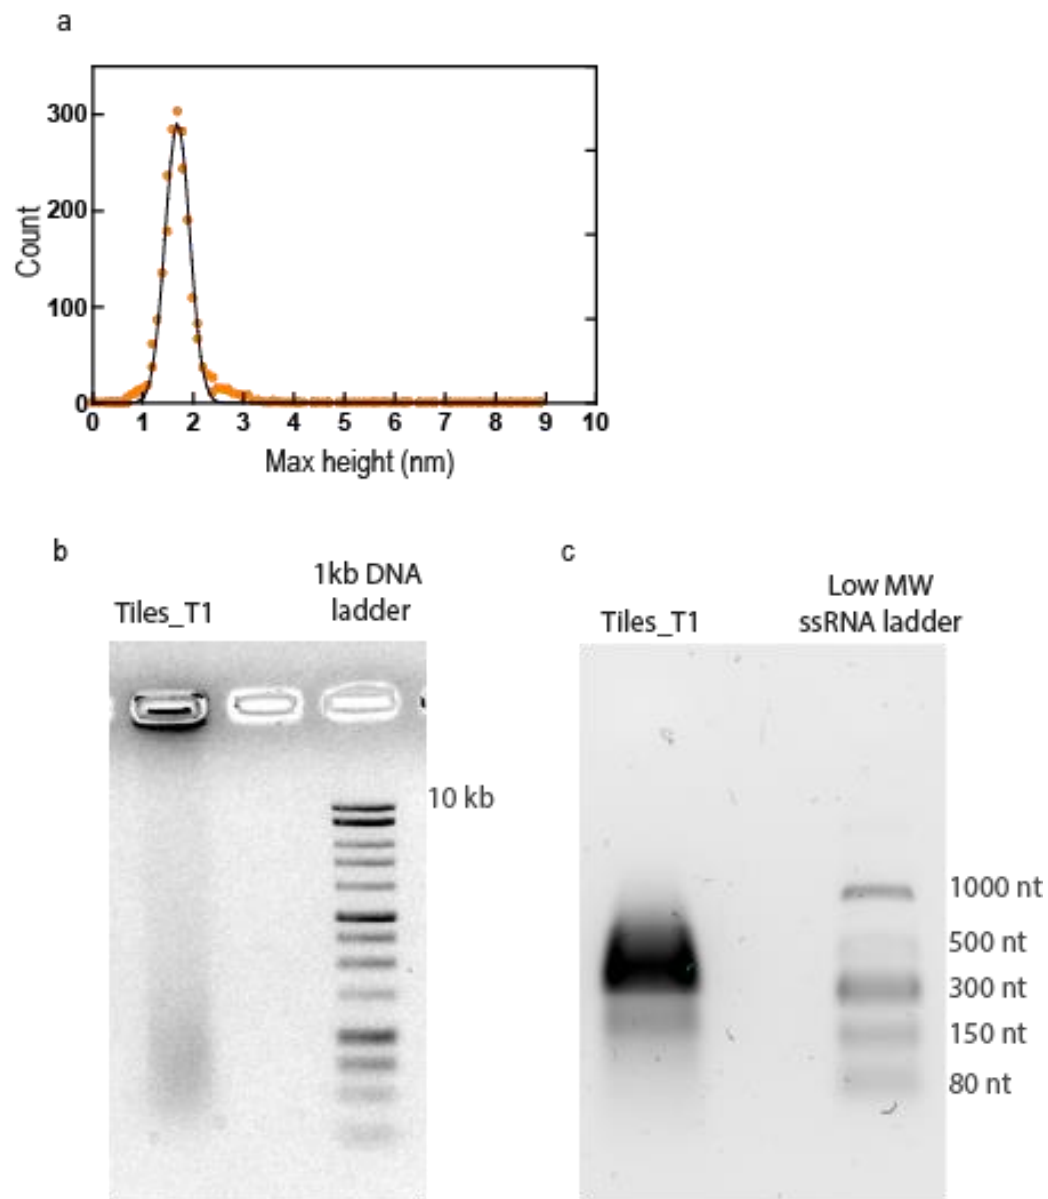

**Supplementary Figure 1: Tiles T1 assembly into filaments** (a) Quantification of filament height by AFM line scan analysis. A Gaussian fit is indicated by the black line. (b) Tiles T1 run on agarose gel in the presence of 10 mM  $\text{MgCl}_2$ . Tiles T1 assemble in filaments that are too large to enter the gel and remain stuck in the loading well. (c) Tiles T1 run on agarose gel in the absence of  $\text{MgCl}_2$  and in presence of 5 mM EDTA. Tiles T1 remain monomeric. This gel also shows the purity of the product obtained by *in vitro* transcription.

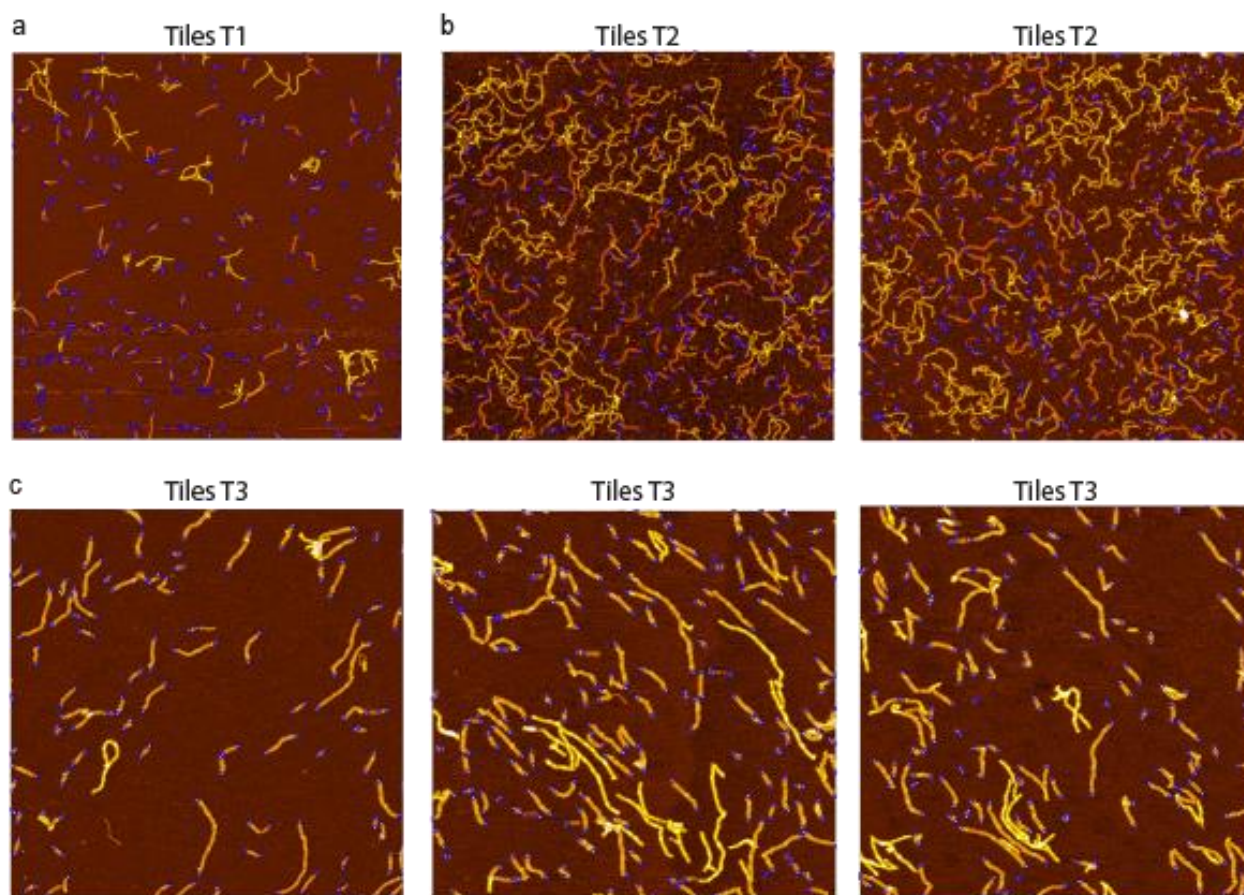

**Supplementary Figure 2:** Images used for filament length quantification. These images are representative AFM scans of (a) Filaments T1, (b) Filaments T2 and (c) Filaments T3. The automatic segmentation is shown as yellow traces on top of the filaments.

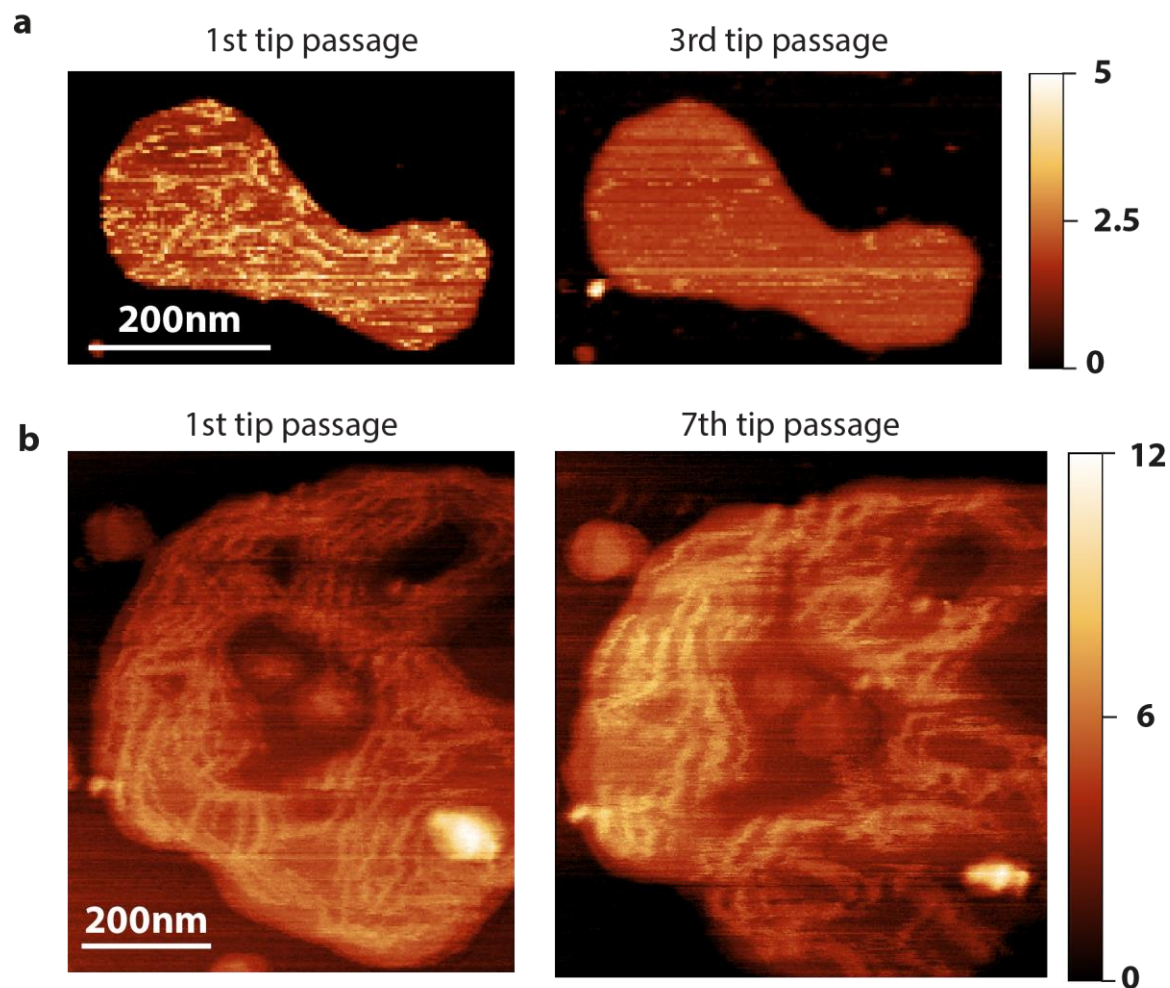

**Supplementary Figure 3: tile binding to membrane via cholesterol or aptamer anchors.** (a) Example of imaging of tiles attached to the membrane via cholesterol-oligo hybridized to the tiles. Tiles are detached by the mechanical action of the AFM tip. (b) Example of imaging of tiles attached to biotinylated lipids via biotin-aptamers that are part of the tile sequence itself.

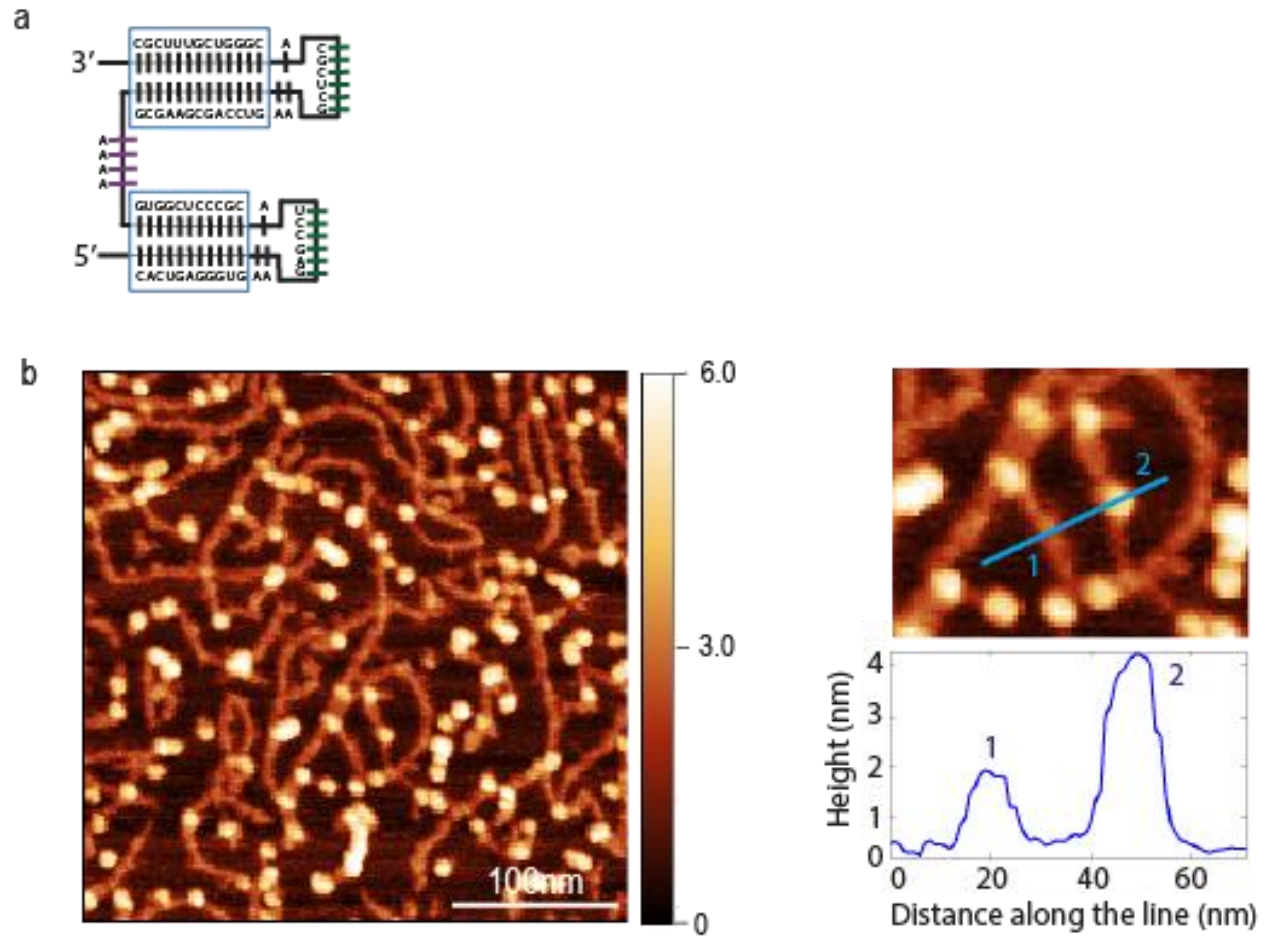

**Supplementary Figure 4: T-cap design and Helicase binding.** (a) Design of T-cap. (b) Helicase Hel308 binding to tile filaments. White blobs correspond to individual helicase molecules bound to the filaments. The panel on the right shows a higher magnification. The height profile across the blue line is shown in the bottom panel.

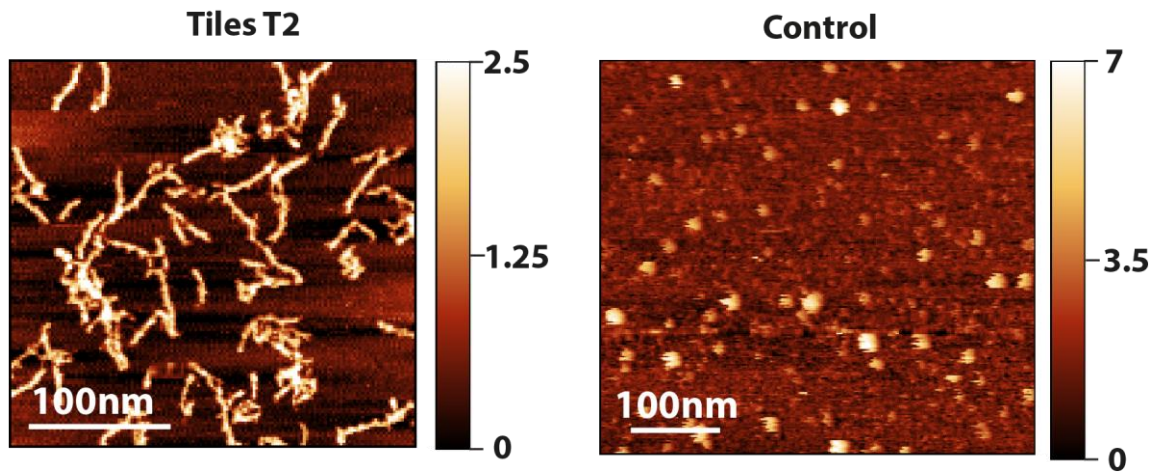

**Supplementary Figure 5: isothermal tile refolding.** 500nM of T2 tiles were incubated for 5 minutes in buffer supplemented with 12.5mM  $\text{MgCl}_2$  (left panel) or 5mM EDTA (right panel) and subsequently deposited on mica for AFM imaging. Spontaneous isothermal tile refolding, resulting in formation of filaments, is visible in the presence of  $\text{MgCl}_2$ . In the presence of EDTA the tiles remained unfolded due to self-repulsion of the ssRNA strand, resulting in the absence of filaments.
